# Supplementary material
Source: PubMed Central journal article supplement (PMC4292496)
Supplement: AEM.02987-14_zam999105988so1.pdf [file AEM.02987-14_zam999105988so1.pdf]

**Supplementary Table 1.** Sequencing statistics for each of the 10 libraries.

| <b>Sample</b>     | <b>Percent Mapped</b> | <b>Total Reads (Num)</b> | <b>Number Mapped</b> |
|-------------------|-----------------------|--------------------------|----------------------|
| <b>Maternal A</b> | 1.90%                 | 2300760                  | 43714                |
| <b>Maternal B</b> | 2.80%                 | 4643898                  | 130029               |
| <b>Control 15</b> | 3.00%                 | 4860444                  | 145813               |
| <b>Control 4</b>  | 9.50%                 | 1852637                  | 176001               |
| <b>Control 8</b>  | 7.50%                 | 4376978                  | 328273               |
| <b>Control 9</b>  | 8.00%                 | 6503085                  | 520247               |
| <b>Mutant 12</b>  | 3.30%                 | 4437113                  | 146425               |
| <b>Mutant 16</b>  | 2.20%                 | 5015593                  | 110343               |
| <b>Mutant 19</b>  | 3.80%                 | 3677796                  | 139756               |
| <b>Mutant 5</b>   | 6.50%                 | 2718329                  | 176691               |

**Supplementary Table 2.** Number of progeny resulting from each of 20 single-fly crosses between uninfected, wild-type males and either infected Mutant 5 line virgin females (Infected) or the same line, cleared of the *Wolbachia* infection (Uninfected).

| Line | Infected |        |       | Uninfected |        |       |
|------|----------|--------|-------|------------|--------|-------|
|      | Male     | Female | Total | Male       | Female | Total |
| 1    | 125      | 155    | 280   | 110        | 300    | 535   |
| 2    | 112      | 150    | 262   | 70         | 283    | 492   |
| 3    | 24       | 39     | 63    | 112        | 78     | 126   |
| 4    | 113      | 95     | 208   | 96         | 168    | 356   |
| 5    | 0        | 1      | 1     | 3          | 2      | 2     |
| 6    | 119      | 129    | 248   | 131        | 229    | 431   |
| 7    | 93       | 105    | 198   | 135        | 200    | 368   |
| 8    | 102      | 131    | 233   | 132        | 251    | 443   |
| 9    | 18       | 29     | 47    | 3          | 58     | 94    |
| 10   | 1        | 0      | 1     | 147        | 0      | 2     |
| 11   | 82       | 126    | 208   | 137        | 239    | 391   |
| 12   | 91       | 140    | 231   | 4          | 250    | 409   |
| 13   | 94       | 132    | 226   | 155        | 242    | 414   |
| 14   | 83       | 107    | 190   | 112        | 196    | 340   |
| 15   | 82       | 131    | 213   | 77         | 237    | 387   |
| 16   | 43       | 53     | 96    | 125        | 106    | 189   |
| 17   | 55       | 84     | 139   | 152        | 168    | 278   |
| 18   | 8        | 14     | 22    | 129        | 14     | 23    |
| 19   | 88       | 130    | 218   | 13         | 222    | 373   |
| 20   | 37       | 41     | 78    | 6          | 81     | 154   |
